# Supplementary material
Source: publisher figshare collection journal article supplement (https://karger.figshare.com/ndownloader/files/28969599)
Supplement: Supplementary file 1 [file 28969599]

**Supplemental Material Table C: Correlations of corona-related anxieties and crisis management perception during the pandemic. Kendall-Tau correlations. ***P*<.01**

| **Anxieties and perceptions of crisis management** | 1 | 2 | 3 | 4 |
| --- | --- | --- | --- | --- |
| 1 My physical fitness is presently (in comparison to time before pandemic) (1: much worse - 5: much better) |  |  |  |  |
| 2 I am afraid that closely related persons get sick of the Corona virus  (1 not at all – 5 very much) | .120** |  |  |  |
| 3 I am afraid that I get sick of the Corona virus (1 not at all – 5 very much) | .095** | .718** |  |  |
| 4 Crisis management by my employer gave me a good orientation.  (1 not at all – 5 very much) | .162** | .271** | .245** |  |
| 5 Crisis management by the policy is realistic.  (1 not at all – 5 very much) | .221** | .564** | .571** | .364** |
